# Supplementary material
Source: Springer Nature journal article supplement (https://www.springermedizin.de/resource/supplementary/12876_2011_599_MOESM2_ESM.pdf/9437332)

A

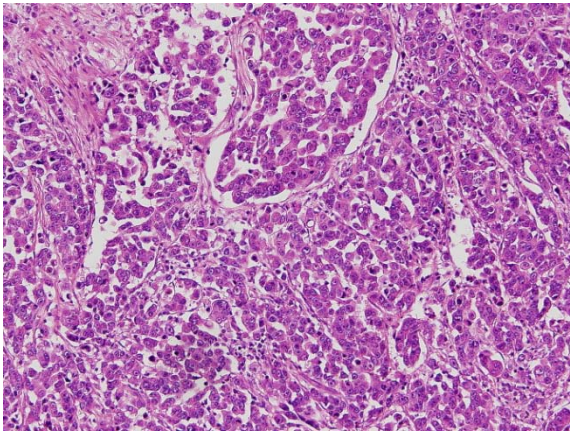

B

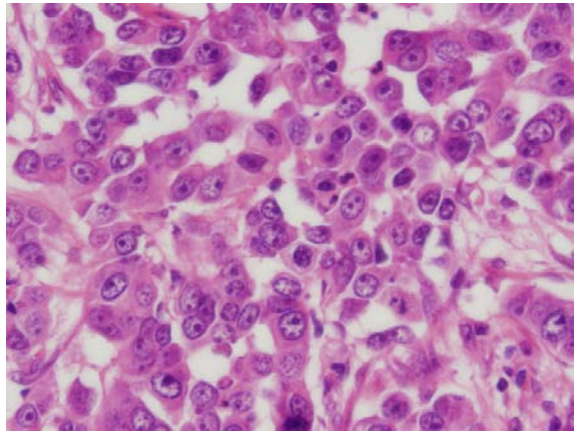

C

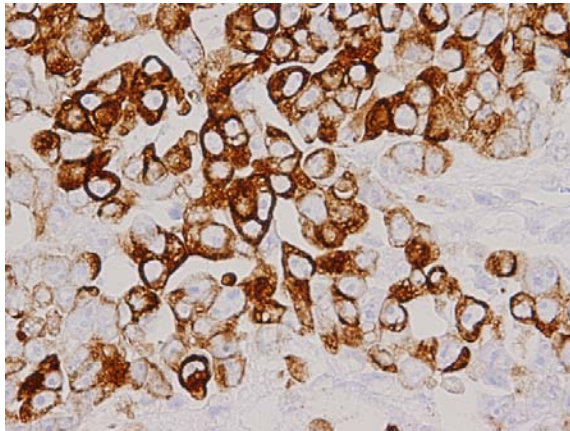

D

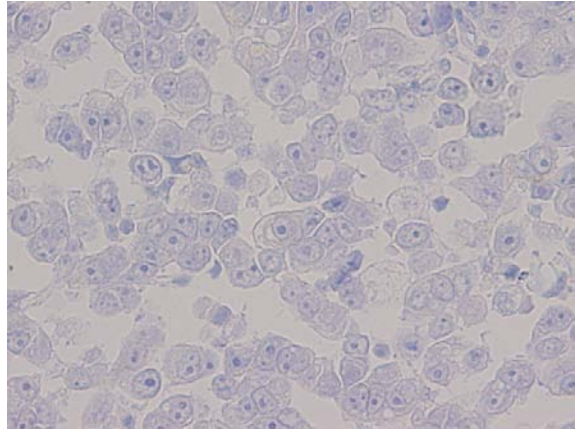

E

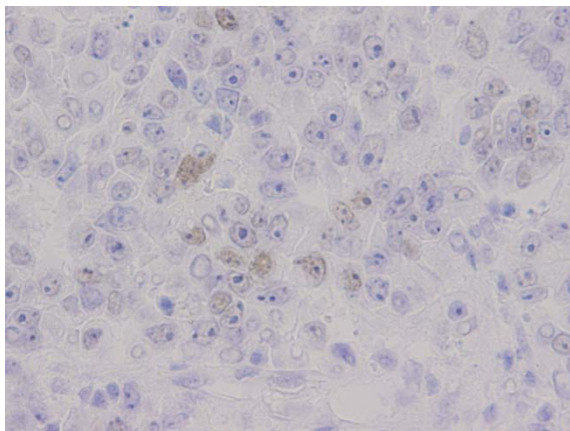

Supplement: MOESM2 [file 9437332]
